# Supplementary material
Source: Springer Nature journal article supplement (https://springermedizin.de/resource/supplementary/12885_2008_1387_MOESM3_ESM.pdf/9472986)

**A**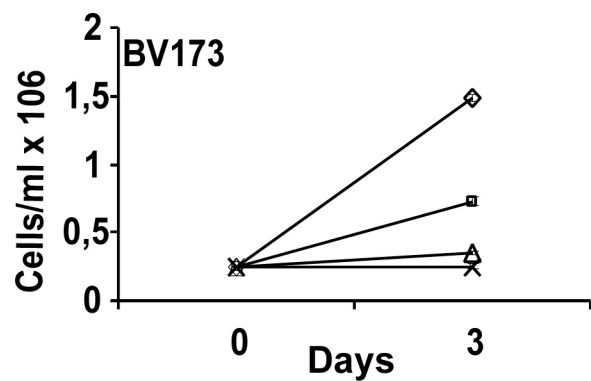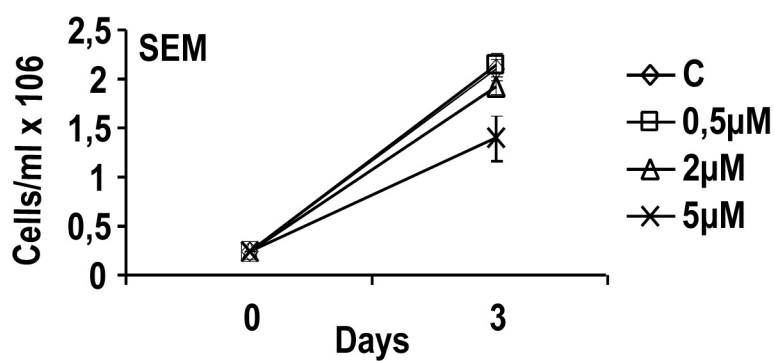

◇ C  
 □ 0,5μM  
 △ 2μM  
 × 5μM

**B**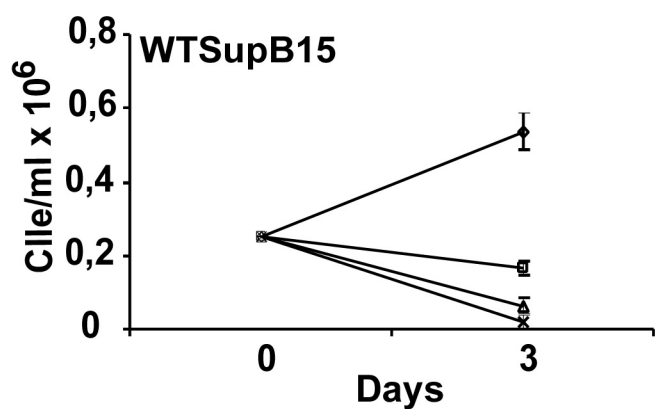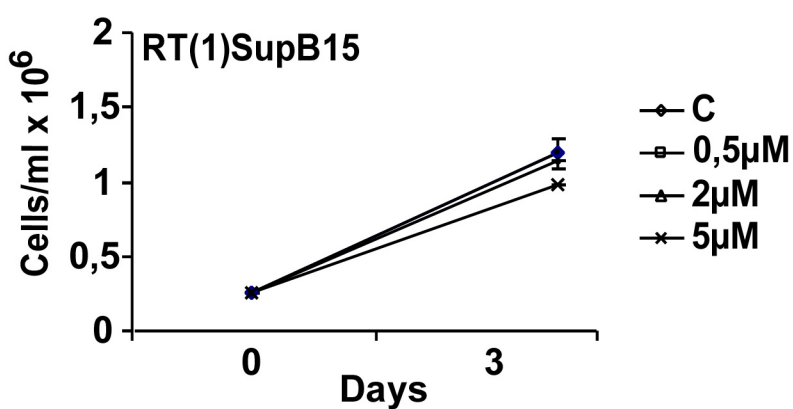

◇ C  
 □ 0,5μM  
 △ 2μM  
 × 5μM

**C**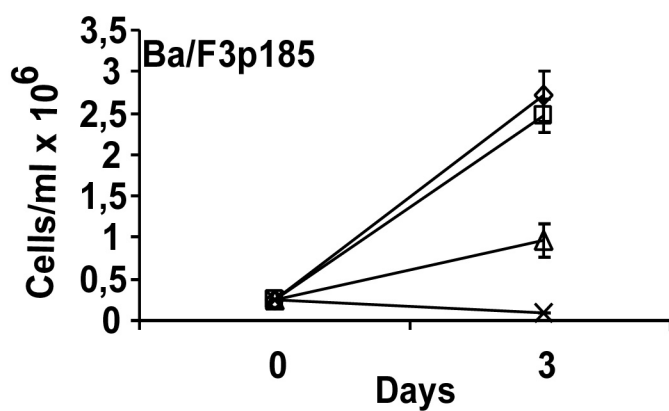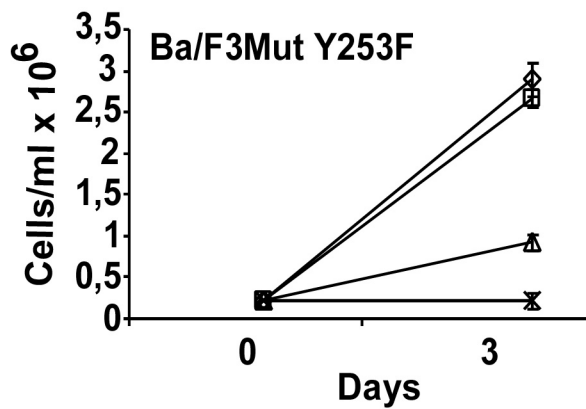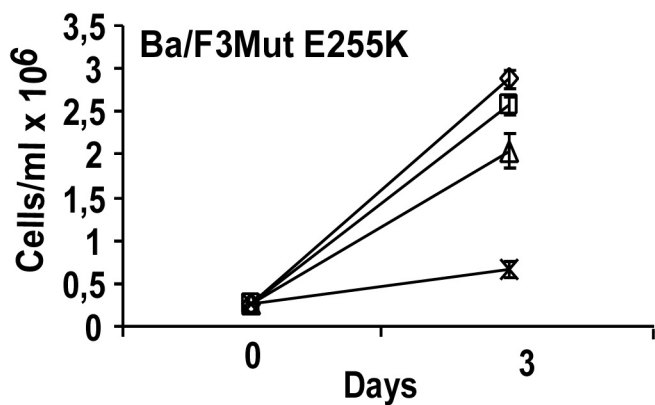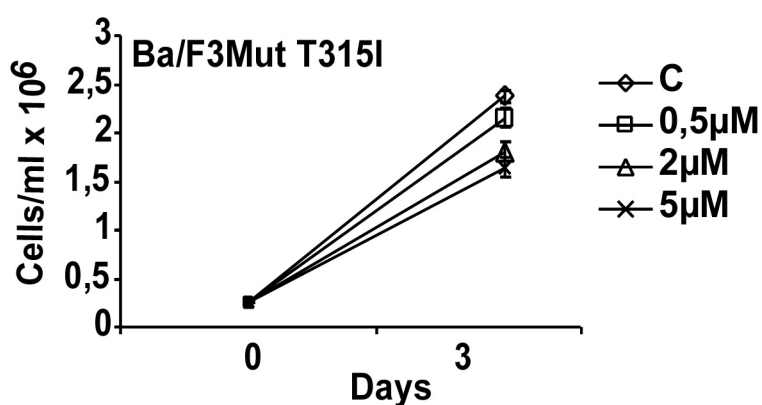

◇ C  
 □ 0,5μM  
 △ 2μM  
 × 5μM

Supplement: MOESM3 [file 9472986]
